# Supplementary material for: Rab-dependent vesicular traffic affects female gametophyte development in Arabidopsis
Source: J Exp Bot. 2020 Sep 16;72(2):320–40. doi: 10.1093/jxb/eraa430 (PMC7853608; doi:10.1093/jxb/eraa430)
Supplement: eraa430_suppl_Supplementart_File001 [file eraa430_suppl_supplementart_file001.pdf]

MS ID#: JEXBOT/2020/284091

MS TITLE: Rab-dependent vesicular traffic affects female gametophyte development in *Arabidopsis*

Joanna Rojek <sup>1</sup>, Matthew R. Tucker <sup>2</sup>, Sara C. Pinto <sup>2,7</sup>, Michał Rychłowski <sup>3</sup>, Małgorzata Lichocka <sup>4</sup>, Hana Soukupova <sup>5</sup>, Julita Nowakowska <sup>6</sup>, Jerzy Bohdanowicz <sup>1</sup>, Gabriela Surmacz <sup>4</sup>, Małgorzata Gutkowska <sup>4, #</sup>

# corresponding author

Małgorzata Gutkowska, [gosiag@ibb.waw.pl](mailto:gosiag@ibb.waw.pl),

### **Supporting information:**

**Figure S1.** Female sporogenesis in *rgtb1* mutants.

**Figure S2.** PIN1-GFP, PIN3-GFP and auxin sensors localization in *rgtb1* seedling roots.

**Figure S3.** Expression of Rab encoding genes in the ovule.

**Table S1.** Proteomic analysis of Rab proteins isolated from WT and *rgtb1* flowers.

**Availability statement:** All data supporting the findings of this study are available

**Figure S1.** Female sporogenesis is similar in WT and *rgtb1* mutants.

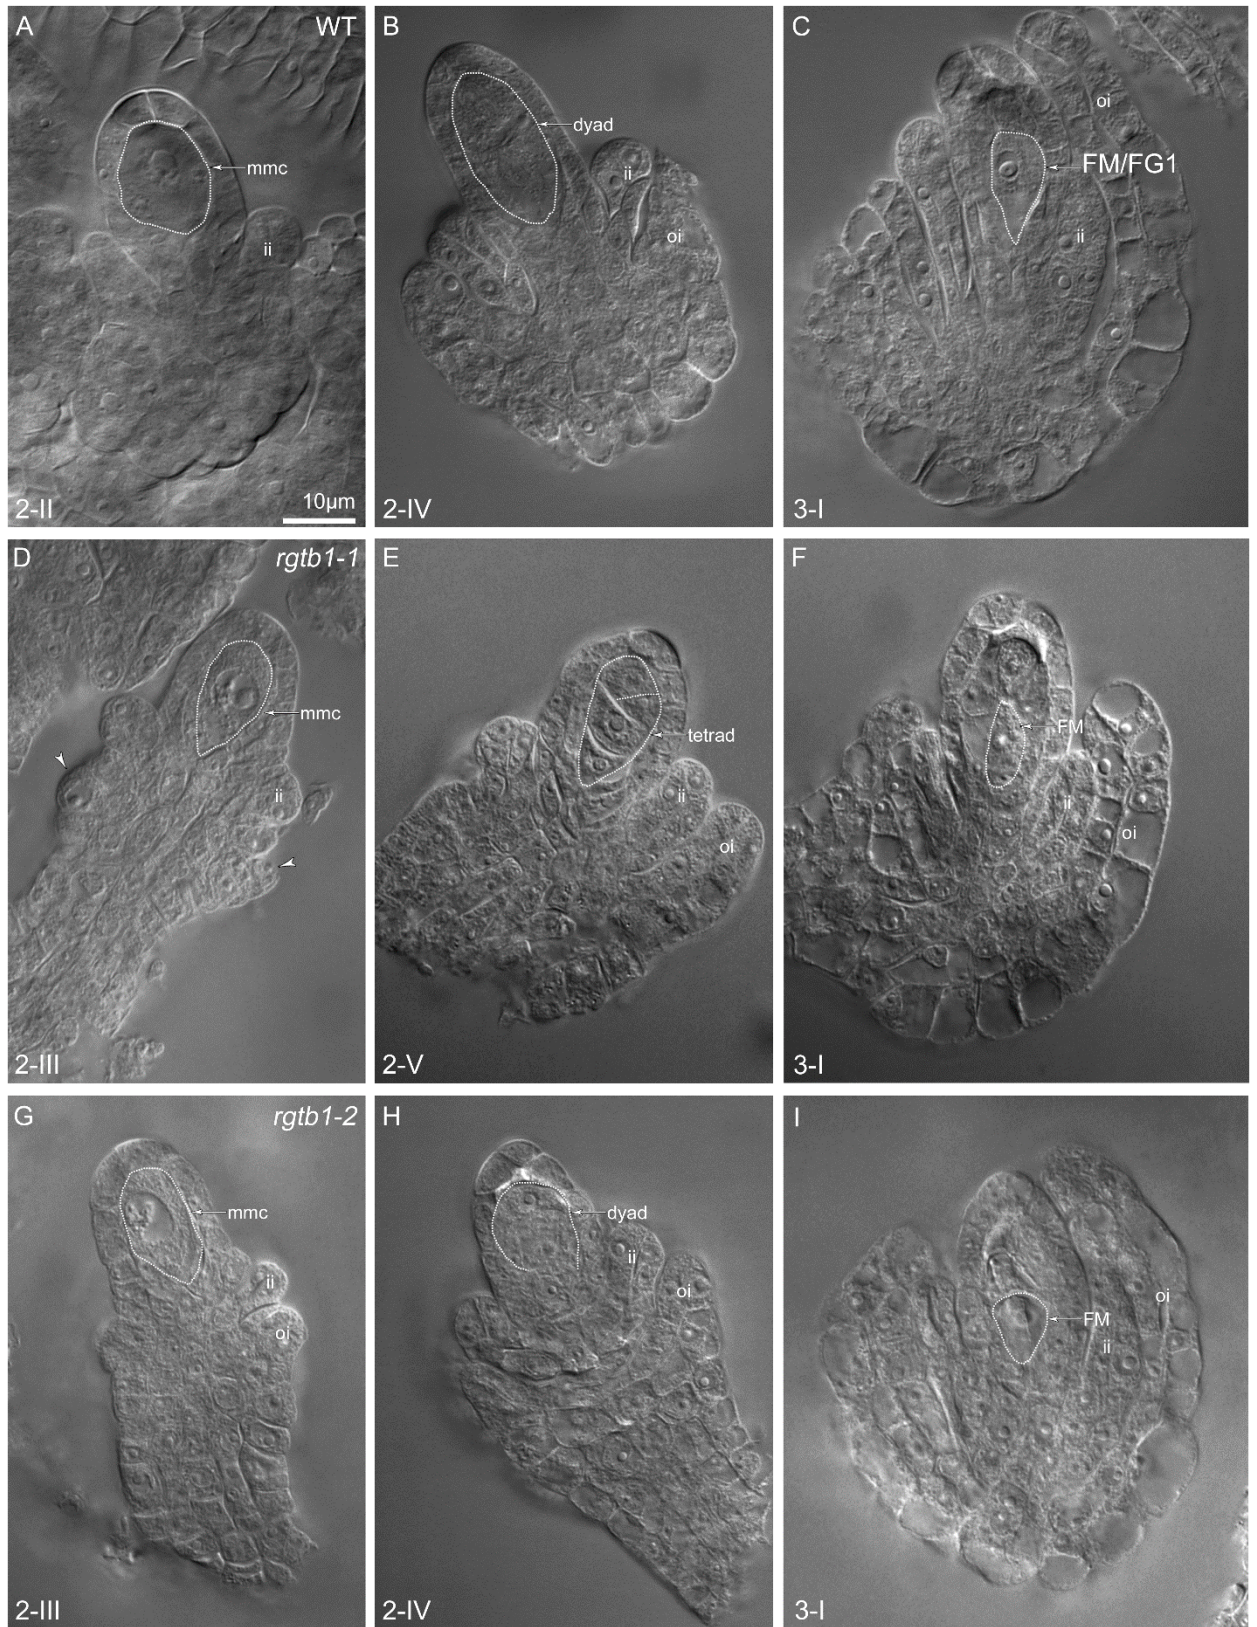

Female sporogenesis from stage 2-II to 3-I (according by Schneitz et al., 1995) in WT (A-C), *rgtb1-1* (D-F) and *rgtb1-2* (G-I). Despite morphological and cellular disruption of *rgtb1* ovules (e.g. F,I), sporogenesis proceeded from the MMC stage to the T-shape tetrad stage (H) and FM formation (F,I), similarly to sporogenesis in WT (A-C). DIC microscopy. Bar = 10 µm in (A) corresponds for all images. Method is described in a main text.

**Figure S2.** Detection of PIN1-GFP, PIN3-GFP and auxin sensors in WT and *rgtb1* seedling roots.

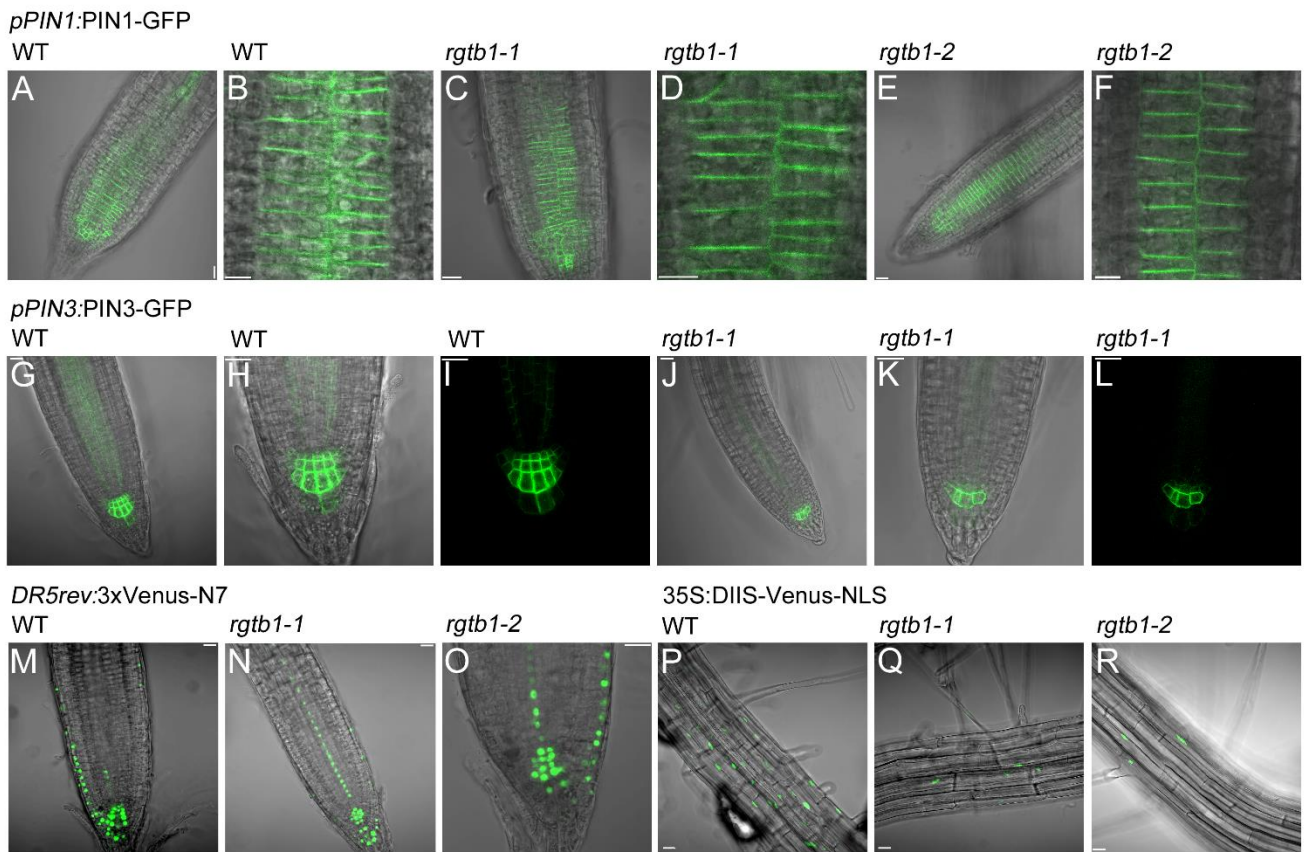

(A-F) *PIN1:PIN1-GFP* expression in roots. (G-L) *PIN3:PIN3-GFP* expression in roots. (M-O) *DR5rev:3xVenus* expression in roots. (P-R) *DIIS-Venus* signal in root epidermis. CLSM microscopy; merged images of DIC and fluorescence signal. Bar = 20  $\mu$ m corresponds to A,C,E,G-N,P-Q images. Bar = 10  $\mu$ m corresponds to B,D,F,O images.

#### Method:

Plants were grown on  $\frac{1}{2}$  MS vertical plates in a growth chamber (Percival, CLF Plant Climatics, Germany) under long day conditions. 10-day-old seedling roots were mounted in water and observed immediately under an Eclipse TE 2000E inverted confocal microscope (Nikon Instruments B.V. Europe, Amsterdam, The Netherlands) equipped with a 60x Plan-Apochromat oil immersion objective. GFP and Venus fusion proteins were excited with a Sapphire 488 nm laser (Coherent, Santa Clara, CA, USA) and observed using the 515/530 nm emission filter. Confocal images were analyzed using free viewer EZ-C1 software and Image J software.

**Figure S3.** Expression of Rab encoding genes in the ovule.

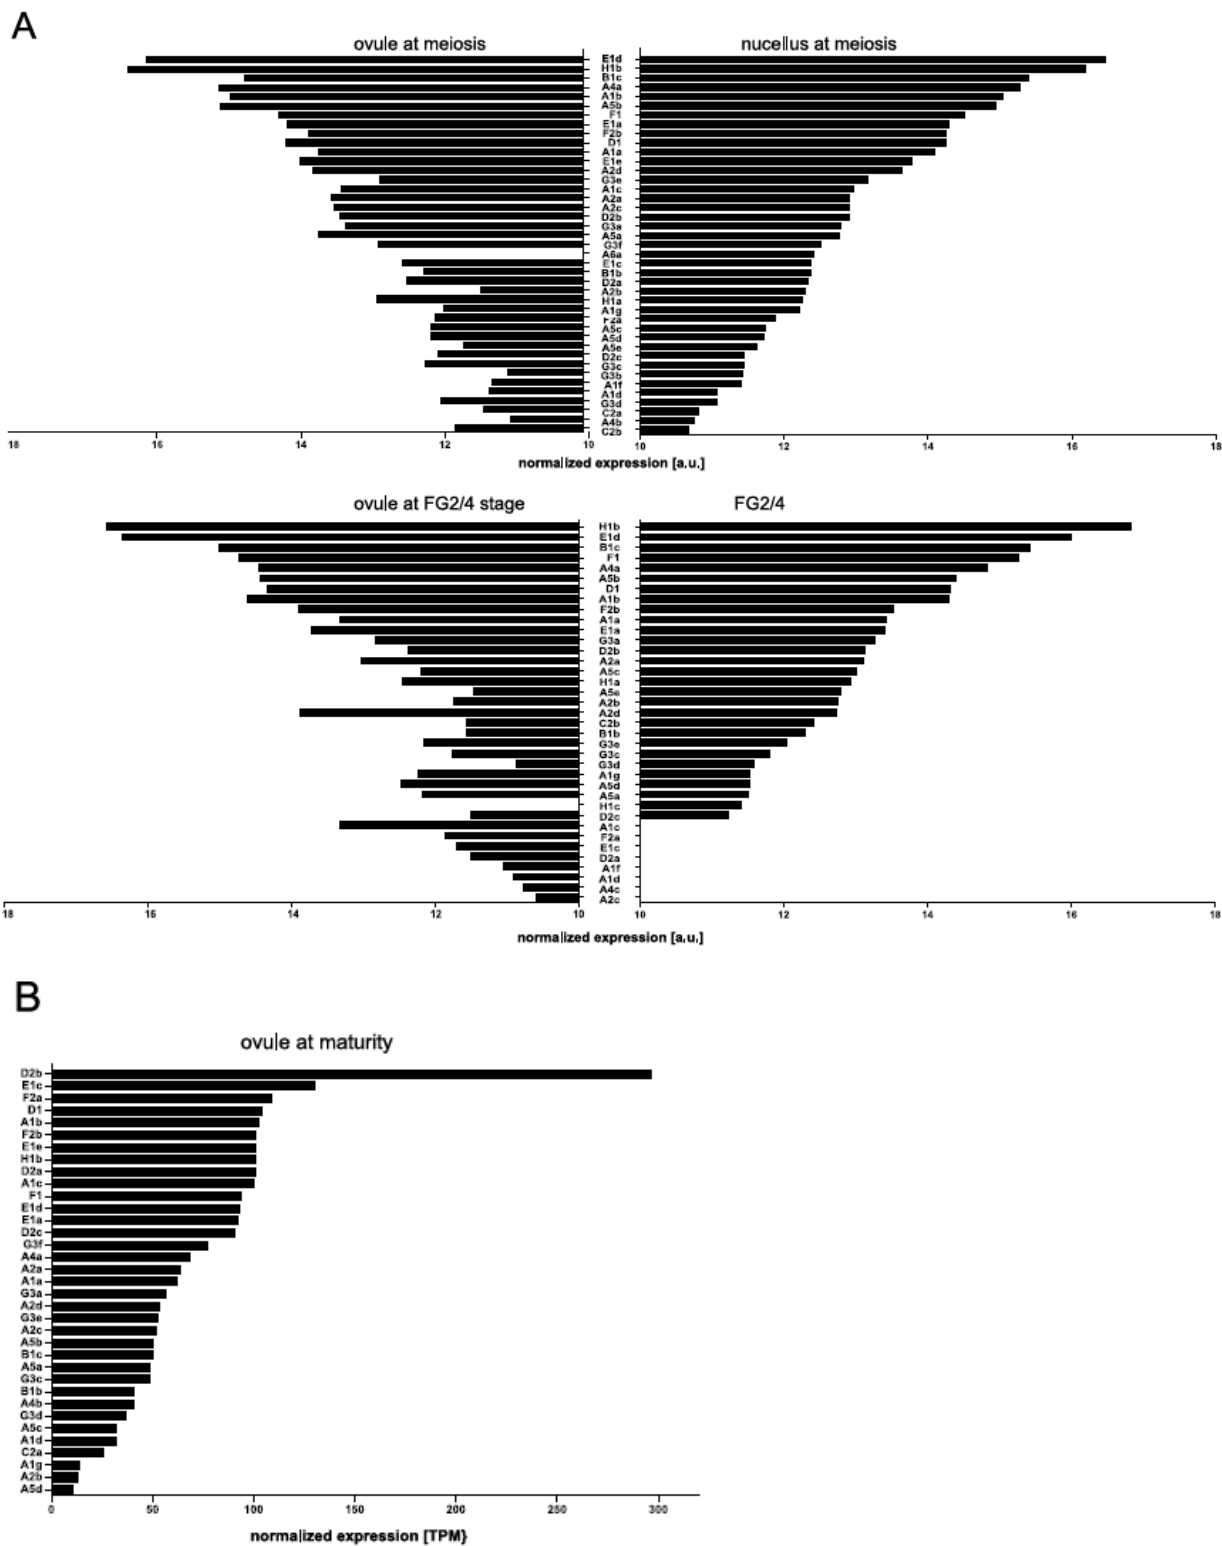

A) Expression of Rab encoding genes in WT ovules during megasporogenesis and development of 2-4 nucleate female gametophytes (FG2-4). Nucellar tissue and FG2-4 samples were laser microdissected and analysed (Tucker *et al.*, 2012a). The rest of the ovule tissues from dissected samples were collected separately. Means of normalized gene expression values for the Col WT nucellus, female gametophyte and whole ovule +/- SD are presented. (B) RNAseq reads from the experiment SRP075604 were downloaded from publically available databases (Klepikova *et al.*, 2015; Klepikova *et al.*, 2016).

**Table S1.** Proteomic analysis of Rab proteins isolated from WT and *rgtb1* flowers

| Protein name      | Gene number                                                                | Mean peptide coverage +/- SD [%] |                 |                | Number of peptides |
|-------------------|----------------------------------------------------------------------------|----------------------------------|-----------------|----------------|--------------------|
|                   |                                                                            | WT                               | <i>rgtb1-1</i>  | <i>rgtb1-2</i> |                    |
| Rab A1a,b,c,d,f,g | AT1G06400<br>AT1G16920<br>AT5G45750<br>AT4G18800<br>AT5G60860<br>AT3G15060 | 26.29 +/- 8.63                   | 29.71 +/- 10.70 | 23.80 +/- 8.35 | 1-9                |
| Rab A2a,b,c,d     | AT1G09630<br>AT1G07410<br>AT3G46830<br>AT5G59150                           | 29.33 +/- 13.26                  | 35.17 +/- 10.98 | 22.8 +/- 9.88  | 2-10               |
| Rab A4a,b,c,d     | AT5G65270<br>AT4G39990<br>AT5G47960<br>AT3G12160                           | 9.00 +/- 3.46                    | 14.00 +/- 1.00  | 11.00 +/- 2.65 | 2-3                |
| Rab A5a,b,c,e     | AT5G47520<br>AT3G07410<br>AT2G43130<br>AT1G05810                           | 10.50 +/- 4.95                   | 16.00 +/- 4.24  | 7.00 +/- 3.46  | 1-5                |
| Rab B1b,c         | AT4G35860<br>AT4G17170                                                     | 20.25 +/- 9.81                   | 14.80 +/- 8.70  | 23.25 +/- 5.74 | 1-4                |
| Rab C1            | AT1G39950                                                                  | 17.67 +/- 3.05                   | 19.33 +/- 5.13  | 10.67 +/- 4.51 | 1-6                |
| Rab D1            | AT3G11730                                                                  | 22.67 +/- 9.81                   | 29.50 +/- 14.85 | 31.67 +/- 3.79 | 3-8                |
| Rab D2a           | AT1G02130                                                                  | 24.00 +/- 0.00                   | 19.67 +/- 3.79  | 24.00 +/- 5.66 | 3-5                |
| Rab D2b,c         | AT5G47200<br>AT4G17530                                                     | 55.67 +/- 5.77                   | 55.00 +/- 4.53  | 54.80 +/- 2.49 | 9-15               |
| Rab E1a,c,d       | AT3G53610<br>AT3G46060<br>AT5G03520                                        | 28.33 +/- 7.63                   | 30.29 +/- 10.16 | 34.57 +/- 8.42 | 4-9                |
| Rab F1            | AT3G54840                                                                  | n.a. (10.00)                     | 12.5 +/- 3.53   | 9.00 +/- 1.73  | 1-5                |
| Rab F2a,b         | AT5G45130<br>AT4G19640                                                     | n.a. (12.00)                     | 19.00 +/- 7.94  | 24.67 +/- 5.68 | 1-4                |
| Rab G3a,b,c,d,e,f | AT4G09720<br>AT1G22740<br>AT3G16100<br>AT1G52280<br>AT1G49300<br>AT3G18820 | 24.00 +/- 13.19                  | 26.00 +/- 7.91  | 22.44 +/- 6.08 | 2-10               |
| Rab H1b,d         | AT2G44610<br>AT2G22290                                                     | 18.00 +/- 11.31                  | 27.00 +/- 1.41  | 23.00 +/- 2.83 | 3-8                |

Lysates from flowers from 6-weeks-old WT and *rgtb1* plants were resolved on SDS-PAGE gels and bands corresponding to mass 17-30 kDa were cut, trypsinized and analysed by LC-MS/MS. Data come from three independent plant cultivations, each containing at least five plants. Mean peptide coverage +/- SD is shown for each identified protein. Only proteins present in all three experiments were taken into account.

To confirm the transcription data we performed MS analysis in order to detect and compare Rab protein prenylation in WT and *rgtb1* flowers. The flower proteome of *Arabidopsis* mirrored well the more spatially and temporarily resolved transcriptome. However, due to the absence of positively ionized amino acid residues close to the C-terminus of any of the Rab proteins (and hence a lack of ionized peptides containing prenylatable cysteines) we were unable to find any difference in peptide geranylgeranylation in *rgtb1* versus WT.

#### Method:

Flower buds and open flowers from WT and *rgtb1* plants were collected, snap frozen in liquid nitrogen and ground. Homogenates were centrifuged and supernatants were boiled in Laemmli buffer and resolved on SDS-PAGE. Protein bands corresponding to the 17-30 kDa region were cut from the gel, digested with trypsin and analyzed by liquid chromatography coupled to a LTQ FT ICR mass spectrometer (Hybrid-2D-Linear Quadrupole Ion Trap – Fourier Transform Ion Cyclotron Resonance Mass Spectrometer, Thermo Electron Corp., San Jose, CA). Acquired raw data were processed by Mascot Distiller followed by Mascot Search (Matrix Science, London, UK) against the TAIR database allowing for geranylgeranylation modification. MS analysis was performed at Mass Spectrometry Laboratory, IBB PAS. Mean peptide coverage and SD were calculated from three repeated independent analyses for a given genotype.
